# Supplementary material for: Functional and Qualitative Metabolic Compounds in the Twigs of the Deciduous Mistletoe Loranthus europaeus Jacq.
Source: MDPI journal article supplement (doi:10.3390/stresses4010002), 2023-12-29

## Supplementary Figures

**Figure S1.** Twigs of *Loranthus europaeus*: Proposed fragmentation pattern for epicatechin/catechin.

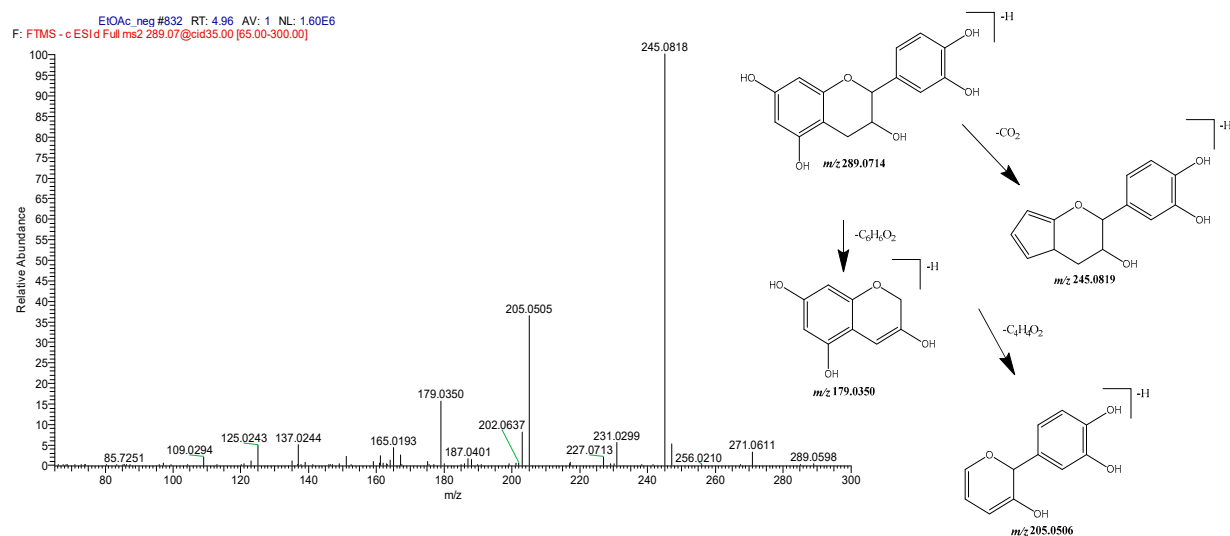

**Figure S2.** Twigs of *Loranthus europaeus*: Proposed fragmentation pattern for rhamnetin-3-O-pentoside.

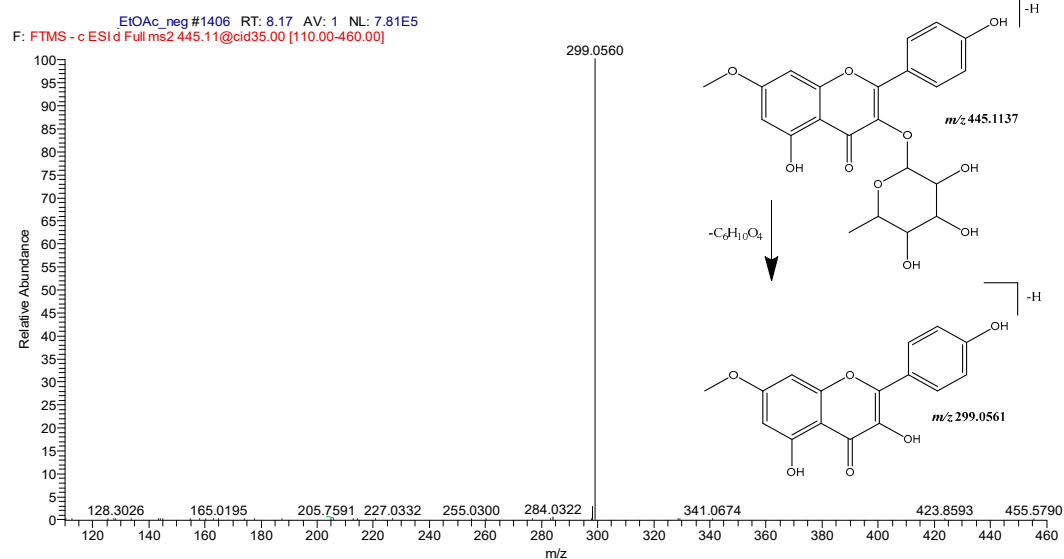

Supplement: s1 [file s1]
